# Supplementary material for: Expression signature based on TP53 target genes doesn't predict response to TP53-MDM2 inhibitor in wild type TP53 tumors
Source: eLife journal article supplement (doi:10.7554/elife.10279), 2015-10-22
Supplement: supp [file elife_poa_e10279_Supplementary_File_1.xlsx]

## Sheet: Supplemental File 1A
Supplemental File 1A. 40 likely TP53 WT cancer cell lines from Jeay et al. (2015) validation set.
Cell Line Name	TP53 mRNA (MAS5-150 201746_at)	TP53 CN ratio	Jeay et al.(2015) 13-genes Signature Prediction	NVP-CGM097 IC50 (µM)	NVP-CGM097 sensitivity	NVP-CFC218 sensitivity
EOL-1	737	0.98	sensitive	0.002	sensitive	sensitive
L-540	546	1.07	sensitive	0.039	sensitive	sensitive
BV-173	483	1.12	sensitive	0.085	sensitive	sensitive
MHH-CALL-4	709	1.01	sensitive	0.109	sensitive	sensitive
SUP-B15	537	1.04	sensitive	0.135	sensitive	sensitive
RS4;11	517	1.08	sensitive	0.177	sensitive	sensitive
D283 Med	282	0.48	sensitive	0.192	sensitive	sensitive
SJSA-1	258	0.92	sensitive	0.223	sensitive	sensitive
GDM-1	469	1.02	sensitive	0.292	sensitive	sensitive
MSTO-211H	126	1.17	sensitive	0.454	sensitive	ND
CAL-54	637	1.29	sensitive	0.544	sensitive	ND
HuNS1	378	1.03	sensitive	0.562	sensitive	sensitive
UACC-62	129	1.13	sensitive	0.626	sensitive	sensitive
OCI-LY3	440	0.68	sensitive	0.663	sensitive	sensitive
MEL-JUSO	330	1.01	sensitive	0.686	sensitive	sensitive
CCF-STTG1	148	1	sensitive	0.87	sensitive	sensitive
MV-4-11	915	0.99	sensitive	0.88	sensitive	sensitive
JM1	889	1.04	insensitive	0.997	sensitive	sensitive
CAL-51	467	1.06	insensitive	1.038	sensitive	sensitive
A549	278	1.4	sensitive	1.198	sensitive	ND
SK-MEL-31	171	0.96	sensitive	1.222	sensitive	sensitive
JL-1	1102	1.01	sensitive	1.421	sensitive	ND
Hs 940.T	165	0.98	sensitive	1.434	sensitive	sensitive
SK-MEL-1	75	0.88	sensitive	1.613	sensitive	sensitive
UACC-257	162	1.16	sensitive	2.143	sensitive	sensitive
COLO-849	482	1.14	sensitive	2.729	sensitive	sensitive
NCI-H28	326	0.84	insensitive	2.827	sensitive	ND
A-498	501	1.24	sensitive	3.943	insensitive	ND
IST-MES1	426	0.91	sensitive	4.063	insensitive	ND
COLO 829	255	1.03	sensitive	4.238	insensitive	sensitive
Caki-1	170	0.79	sensitive	4.721	insensitive	ND
KMRC-2	523	1.06	sensitive	5.239	insensitive	ND
A101D	188	1.03	sensitive	6.729	insensitive	insensitive
IGR-1	51	0.51	sensitive	6.995	insensitive	insensitive
HCC-95	112	0.85	insensitive	7.129	insensitive	ND
DAN-G	33	0.73	insensitive	10	insensitive	insensitive
DM-3	134	0.98	sensitive	10	insensitive	ND
Hs 688(A).T	134	0.99	sensitive	10	insensitive	insensitive
Hs 834.T	216		sensitive	10	insensitive	insensitive
OS-RC-2	168	1.06	sensitive	10	insensitive	ND

## Sheet: Supplemental File 1B
Supplemental File 1B. Performance of Jeay et al. (2015) 13-gene Signature Prediction in validation set of 28 likely TP53 WT cancer cell lines with sensitivity defined by NVP-CFC218. (NVP-CFC218 data was available for 28 out of 40 likely TP53 WT cancer cell lines.)
Performance measure	Cell sensitivity defined by NVP-CFC218
Sensitivity	91% (21/23)
Specificity	20% (1/5) {DAN-G removal 0% (0/4) *}
Positive Predicted Value (PPV)	84% (21/25)
Negative Predicted Value (NPV)	33% (1/3) {DAN-G removal 0% (0/2) *}
Response Rate	82% (23/28)
* DAN-G has TP53 mRNA expression of 33 (MAS5-150 201746_at) indicating the probable loss of TP53.
(Stringent TP53 mRNA expression cutoff is set at 32 (MAS5-150 201746_at) to indicate loss of TP53.)

## Sheet: Supplemental File 1C
Supplemental File 1C. List of 29 cell lines with inactivated TP53 in the set of 113 cancer cell lines considered to be TP53 wild type by Jeay et al. (2015).
Cell Line Name	TP53 inactivating mutation(s)	Alternative reads / Reference reads	NVP-CFC218 sensitivity	TP53 mRNA (MAS5-150 201746_at)	TP53 CN ratio
HPB-ALL	p.C124*	183/21	insensitive	28	0.55
NCI-H1373	p.E339*	8/0	insensitive	16	0.77
SW403	p.E51*	5/0	insensitive	53	0.68
U-937	p.G187_splice	75/0	insensitive	15	0.84
HLF	p.G244A	69/0	insensitive	252	1.13
HEL 92.1.7	p.M133K	22/0	insensitive	179	0.76
BICR 31	p.173_174VR>G	267/1	insensitive	537	0.9
SCaBER	p.R110L	3/0	insensitive	215	0.75
SU-DHL-8	p.R249G, p.Y234N	26/31, 31/27	insensitive	1804	0.94
KMM-1	p.S241F	43/68	insensitive	46	0.73
HCC-78	p.S241F	76/0	insensitive	201	0.52
ES-2	p.S241F	79/0	insensitive	154	0.97
JHOS-2	p.S261_splice	47/51	insensitive	198	0.65
KMS-11			insensitive	2	0.02
COR-L23			insensitive	795	0.03 *
MDA-MB-453			insensitive	6	0.07
MPP 89			insensitive	1	0.1
NCI-H358			insensitive	7	0.1
SK-N-AS			insensitive	1	0.5
MG-63			insensitive	1	0.7
COV644			insensitive	1	0.74
NCI-H2452			insensitive	1	0.9
PE/CA-PJ49			insensitive	1	1.01
KP4			insensitive	3	1.01
NCI-H2347			insensitive	20	0.54
NCI-H2172			insensitive	24	0.93
L3.3			insensitive	27	0.72
VMRC-RCZ			insensitive	29	0.52
RERF-LC-AI			insensitive	31	1.31
* deletion of exons 2,3,4

## Sheet: Supplemental File 1D
Supplemental File 1D. 84 likely TP53 WT cancer cell lines from Jeay et al. (2015).
Cell Line Name	NVP-CFC218 sensitivity	TP53 mRNA (MAS5-150 201746_at)	TP53 CN ratio
G-361	sensitive	71	0.68
LU99	sensitive	93	0.81
COLO-679	sensitive	115	0.94
TE 617.T	sensitive	119	0.99
K029AX	sensitive	151	1.04
DK-MG	sensitive	181	0.96
NCI-H1666	sensitive	195	0.71
Hep G2	sensitive	205	0.94
NCI-H2052	sensitive	210	0.96
HCT 116	sensitive	212	1.08
Caki-2	sensitive	229	0.81
DBTRG-05MG	sensitive	242	1.06
KYM-1	sensitive	246	1
769-P	sensitive	248	1.05
KS-1	sensitive	251	1.07
HT-144	sensitive	257	0.96
G-401	sensitive	257	1.06
WM-115	sensitive	263	1
ACHN	sensitive	286	1.34
A-375	sensitive	303	1.09
KE-97	sensitive	305	1.06
A2780	sensitive	313	0.99
H4	sensitive	317	0.64
SUP-M2	sensitive	329	0.94
Hey-A8	sensitive	343	1.08
G-402	sensitive	344	0.98
WM-266-4	sensitive	360	1.11
KP-N-SI9s	sensitive	365	0.92
A-204	sensitive	377	1.02
CHP-212	sensitive	403	0.98
GP2d	sensitive	442	1.01
Hs 695T	sensitive	480	1.24
JHUEM-2	sensitive	488	0.98
AMO-1	sensitive	489	1.21
BDCM	sensitive	495	1.01
NALM-6	sensitive	662	1.09
OCI-AML2	sensitive	687	1.04
Reh	sensitive	829	1.07
DOHH-2	sensitive	904	1.05
MOLM-13	sensitive	967	0.95
JVM-3	sensitive	990	0.97
697	sensitive	998	1.11
GRANTA-519	sensitive	1066	0.53
QGP-1	insensitive	37	1.27
Capan-2	insensitive	44	0.6
Sq-1	insensitive	50	0.68
RKO	insensitive	55	1.04
Hs 936.T	insensitive	69	0.69
Hs 618.T	insensitive	88	0.96
MEL-HO	insensitive	100	0.66
PK-45H	insensitive	111	1
U-87 MG	insensitive	123	1.02
NCI-H1944	insensitive	126	1.01
Hs 944.T	insensitive	130	0.76
KMRC-1	insensitive	130	0.83
SK-MEL-5	insensitive	132	1.04
C32	insensitive	152	0.98
HEC-265	insensitive	164	1.1
KU-19-19	insensitive	167	0.94
COLO 792	insensitive	185	0.87
LN-229	insensitive	191	0.81
NCI-H460	insensitive	195	1.26
NCI-H1341	insensitive	211	0.84
KMS-28BM	insensitive	219	0.49
ONS-76	insensitive	225	0.6
Hs 888.T	insensitive	245	0.92
Malme-3M	insensitive	249	1.2
SK-MEL-24	insensitive	251	1.02
C3A	insensitive	261	0.92
LOX IMVI	insensitive	264	0.85
COV434	insensitive	264	1.02
HCC1500	insensitive	269	0.59
SW 780	insensitive	280	1.04
WM-88	insensitive	297	0.74
KMS-27	insensitive	311	1.01
TOV-21G	insensitive	336	0.97
SW 1573	insensitive	374	1.19
NCI-H1299	insensitive	381	0.41
SK-HEP-1	insensitive	432	1.4
IM95	insensitive	486	0.97
OAW42	insensitive	497	0.82
MOG-G-UVW	insensitive	521	1.19
A172	insensitive	581	1.1
SNG-M	insensitive	611	0.96

## Sheet: Supplemental File 1E
Supplemental File 1E. COSMIC information on mutations in cell lines listed in the Table 1.
Cell Line Name	TP53 amino acid change	TP53 coding sequence change	Mutation(s) is in COSMIC v74	COSMIC sample ID
KASUMI-1	p.R248Q	c.743G>A	Yes	COSS907275
COLO-818	p.C135R	c.403T>C	Cell line is not in COSMIC	NA
IGR-37	p.C229fs	c.686_687delGT	Yes	COSS1240153
HCC202	p.T284fs	c.851_852delCA	Yes	COSS1290906
EFM-192A	p.F270fs	c.810_811insT	Yes	COSS1290798
NCI-H1568	p.H179R	c.536A>G	Yes	COSS1298348
COLO-783	p.P27L	c.80C>T	Yes	COSS1240125
GA-10	p.I232N, p.P152L	c.695T>A, c.455C>T	Yes	COSS1303896
VMRC-RCW	p.I332_splice	c.994_splice	Yes	COSS1240224
JHH-5	p.PPQH190del	c.569_580delCTCCTCAGCATC	Cell line is not in COSMIC	NA
Yes - in "Mutation(s) is in COSMIC v74" indicates that the COSMIC contains identical TP53 mutation(s) in the same cell line.
